# Supplementary material
Source: ML conference proceedings conference paper supplement (https://openreview.net/forum?id=tocfToCGF1)
Supplement: supplementary_material [file attachment]

# Appendix: Break the Visual Perception: Adversarial Attacks Targeting Encoded Visual Tokens of Large Vision-Language Models

Anonymous Authors

## A VICTIM MODEL DETAILS

The details of victim large vision-language models are illustrated in Table 1. Various LVLs employ LLMs with large number of parameters, including LLaMA [9], MPT [8], OPT [11], and Vicuna [1]. To reduce randomness, we consistently employ greedy search to generate answers for clean images or adversarial images.

**Table 1: The image encoders and base LLMs of victim models.**

| Victim Model     | Image Encoder          | Base LLM    |
|------------------|------------------------|-------------|
| LLaVA            | OpenAI CLIP ViT-L      | LLaMA-2-13b |
| Otter            | OpenAI CLIP ViT-L      | MPT-7b      |
| LLaMA-Adapter-V2 | OpenAI CLIP ViT-L      | LLaMA-7b    |
| OpenFlamingo     | OpenAI CLIP ViT-L      | MPT-7b      |
| MiniGPT-4        | EVA CLIP ViT-G         | Vicuna-7b   |
| BLIP-2           | EVA CLIP ViT-G         | OPT-2.7b    |
| InstructBLIP     | EVA CLIP ViT-G         | Vicuna-7b   |
| mPLUG-Owl-2      | ViT-L (non-pretrained) | LLaMA-2-7b  |

## B ADDITIONAL EXPERIMENTAL RESULTS

### B.1 VT-Attack Results against Different LVLs

We provide additional qualitative results of VT-Attack against different LVLs. Table 3, Table 4 and Table 5 present the results of attacking LLaVA [5], MiniGPT-4 [12] and mPLUG-Owl2 [10]. It can be observed that our proposed VT-Attack leads to outputs that are less relevant to the original answers compared to the baseline methods. This further illustrates the greater disruption caused by VT-Attack on information in visual tokens.

### B.2 Results of Same Adversarial Image Attacking Various LVLs

Figure 1 and Figure 2 present the additional comparison of the answers generated by different LVLs when taking the same clean image and adversarial image as inputs. It can be observed that the same adversarial image leads to different outputs from different models. This indicates that the adversarial images whose encoded visual tokens are disrupted may not exhibit strong semantics; otherwise, different models should generate similar outputs.

### B.3 Breakdown of LLaVA to Non-Visual Question Answering

In experiments we have observed that when adversarial images generated by VT-Attack are input to LLaVA [5], the question-answering capability of LLaVA not only exhibit failure to image-based queries, but also break in addressing non-visual prompts. Even when the

questions posed are unrelated to the images such as "What is artificial intelligence?", the model fails to provide reasonable responses. An example is depicted in Table 6. One possible reason is that the intermediate module of LLaVA is only a linear layer with a significantly smaller number of parameters. Therefore, LLaVA is more sensitive to corrupted visual tokens compared to other LVLs, even when queried with non-visual questions.

## C ATTACK PERFORMANCE OVER ITERATIONS

The influence of attack iterations on attack performance (CLIP score) is illustrated in Figure 3, taking LLaVA [5] as an example. Increasing the number of attack iterations generally enhances the attack effectiveness. However, the improvement becomes less significant when the number of iterations exceeds 800.

## D PROMPTS FOR DIFFERENT TASKS

To investigate the generality of adversarial examples across different prompts, we employ three question-answering tasks. Below are prompts used for image captioning task.

1. Describe this image briefly in one sentence.
2. Give a brief description of the image.
3. Can you provide a brief description of this image?
4. Offer a brief caption for this image.
5. Give a short overview of this image.
6. Provide a short summary of this picture.
7. Describe this picture in a few words.
8. Summarize this image briefly.
9. Please provide a short title for this image.
10. Briefly explain what is shown in this image.

The prompts for general VQA are illustrated below.

1. Is there a mobile phone in this image?
2. Is there any text or writing visible in the image?
3. Can you see any shoes in this image?
4. How many pens are visible in this picture?
5. Any signs of human activity in the image?
6. Where was this image taken?
7. Can you see animals in this image?
8. Can you identify any vehicles?
9. Are there any objects related to food?
10. Do you notice any body of water?

The prompts for detailed VQA are shown as below.

- 117

118

119

120

121

122

123

124

125

126

127

128

129

130

131

132

133

134

135

136

137

138

139

140

141

142

143

144

145

146

147

148

149

150

151

152

153

154

155

156

157

158

159

160

161

162

163

164

165

166

167

168

169

170

171

172

173

174
- 175

176

177

178

179

180

181

182

183

184

185

186

187

188

189

190

191

192

193

194

195

196

197

198

199

200

201

202

203

204

205

206

207

208

209

210

211

212

213

214

215

216

217

218

219

220

221

222

223

224

225

226

227

228

229

230

231

232
- 117

118

119

120

121

122

123

124

125

126

127

128

129

130

131

132

133

134

135

136

137

138

139

140

141

142

143

144

145

146

147

148

149

150

151

152

153

154

155

156

157

158

159

160

161

162

163

164

165

166

167

168

169

170

171

172

173

174
- 175

176

177

178

179

180

181

182

183

184

185

186

187

188

189

190

191

192

193

194

195

196

197

198

199

200

201

202

203

204

205

206

207

208

209

210

211

212

213

214

215

216

217

218

219

220

221

222

223

224

225

226

227

228

229

230

231

232
- 117

118

119

120

121

122

123

124

125

126

127

128

129

130

131

132

133

134

135

136

137

138

139

140

141

142

143

144

145

146

147

148

149

150

151

152

153

154

155

156

157

158

159

160

161

162

163

164

165

166

167

168

169

170

171

172

173

174
- 175

176

177

178

179

180

181

182

183

184

185

186

187

188

189

190

191

192

193

194

195

196

197

198

199

200

201

202

203

204

205

206

207

208

209

210

211

212

213

214

215

216

217

218

219

220

221

222

223

224

225

226

227

228

229

230

231

232

## E SENSITIVITY TO PIXEL NOISE DEFENSE

Adding tiny Gaussian noise to adversarial images is a simple way of model defense. To investigate the sensitivity of adversarial examples to it, we conduct experiments for BLIP-2 [4] as an example, and the results are shown in Table 2. Adversarial images are not sensitive to pixel noise if the size is relatively small. When the noise size exceeds 5/255, the attack performance starts to decline. However, overall, Gaussian noise within the same magnitude (8/255) as adversarial perturbations does not significantly affect the attack performance.

**Table 2: The impact of adding Gaussian noise to adversarial images on attack performance (CLIP Score ↓) compared to clean images.**

| Noise Size | Clean | Adversarial |
|------------|-------|-------------|
| 0/255      | 30.44 | 20.32       |
| 1/255      | 30.41 | 20.41       |
| 2/255      | 30.47 | 20.37       |
| 3/255      | 30.19 | 20.36       |
| 4/255      | 30.38 | 20.48       |
| 5/255      | 30.55 | 20.77       |
| 6/255      | 30.21 | 21.12       |
| 7/255      | 30.37 | 21.90       |
| 8/255      | 30.29 | 22.67       |

**Table 3: Additional cases of attack results against LLaVA [5] in different methods.**

| Image                                                                             | Method         | LVLM-Output                               | Image                                                                             | Method         | LVLM-Output                                    |
|-----------------------------------------------------------------------------------|----------------|-------------------------------------------|-----------------------------------------------------------------------------------|----------------|------------------------------------------------|
|  | No Attack      | a group of monkeys on a tree              |  | No Attack      | a row of police cars parked on a city street   |
|                                                                                   | E2E [7]        | a tree filled with many birds             |                                                                                   | E2E [7]        | two green police cars driving down a street    |
|                                                                                   | CLIP-Based [2] | a black bear holding an object            |                                                                                   | CLIP-Based [2] | a clock on a building, a truck, and a person   |
|                                                                                   | VT-Attack      | a person holding a cup                    |                                                                                   | VT-Attack      | a white building with a clock                  |
|  | No Attack      | a white dog sitting on the grass          |  | No Attack      | a plaque on a brick wall                       |
|                                                                                   | E2E [7]        | a large dog walking through the snow      |                                                                                   | E2E [7]        | a close-up of a gravestone with a name on it   |
|                                                                                   | CLIP-Based [2] | a dog with a collar and a tag             |                                                                                   | CLIP-Based [2] | a building with a sign on it                   |
|                                                                                   | VT-Attack      | the a question, the the, the, the         |                                                                                   | VT-Attack      | a a, a, a, a a, a a, a a a in the              |
|  | No Attack      | a young boy standing next to a fire truck |  | No Attack      | a hummingbird perched on a thin branch         |
|                                                                                   | E2E [7]        | an elderly woman walking down the street  |                                                                                   | E2E [7]        | a bird standing on a bamboo stick              |
|                                                                                   | CLIP-Based [2] | two women posing for a picture in a park  |                                                                                   | CLIP-Based [2] | a bird with a long beak on a wooden pole       |
|                                                                                   | VT-Attack      | a man is holding a red cell phone         |                                                                                   | VT-Attack      | the question, the question, the, the question  |
|  | No Attack      | a pile of yarn sitting on a table         |  | No Attack      | a small brown and white dog lying on the grass |
|                                                                                   | E2E [7]        | a crochet hook and a ball of yarn         |                                                                                   | E2E [7]        | a large brown dog playing with toy horses      |
|                                                                                   | CLIP-Based [2] | a pair of old, worn-out leather boots     |                                                                                   | CLIP-Based [2] | a large brown bear with paws                   |
|                                                                                   | VT-Attack      | a yellow cloth bag with a yellow cloth    |                                                                                   | VT-Attack      | a person is seen holding a piece of wood       |
|  | No Attack      | a bottle of Fanta and a can of Coca-Cola  |  | No Attack      | a pair of Nike sneakers sitting in a box       |
|                                                                                   | E2E [7]        | a bottle of green sauce or dressing       |                                                                                   | E2E [7]        | a woman holding a large pile of shoes          |
|                                                                                   | CLIP-Based [2] | a person holding a box of tissues         |                                                                                   | CLIP-Based [2] | a pair of shoes with a shredded shoe lace      |
|                                                                                   | VT-Attack      | a person is sitting at a table            |                                                                                   | VT-Attack      | the the, the, the, the, the, the, the          |

**Table 4: Additional cases of attack results against MiniGPT-4 [12] in different methods.**

| Image                                                                               | Method         | LVLM-Output                                | Image                                                                               | Method         | LVLM-Output                                     |
|-------------------------------------------------------------------------------------|----------------|--------------------------------------------|-------------------------------------------------------------------------------------|----------------|-------------------------------------------------|
|  | No Attack      | a man and a woman in a sailboat            |  | No Attack      | a carriage being pulled by horses               |
|                                                                                     | E2E [7]        | two people are sitting on a sailboat       |                                                                                     | E2E [7]        | a carriage is being pulled by a man             |
|                                                                                     | CLIP-Based [2] | a group of people on a boat in the river   |                                                                                     | CLIP-Based [2] | a man in a suit carrying a baby in a stroller   |
|                                                                                     | VT-Attack      | a dog sitting on a bench                   |                                                                                     | VT-Attack      | a small dog pulling a toy cart                  |
|  | No Attack      | a large ship with waves crashing           |  | No Attack      | a group of men playing basketball               |
|                                                                                     | E2E [7]        | a large cruise ship sailing on the ocean   |                                                                                     | E2E [7]        | two men in basketball uniforms                  |
|                                                                                     | CLIP-Based [2] | a book cover with a picture of a boat      |                                                                                     | CLIP-Based [2] | a group of people playing basketball game       |
|                                                                                     | VT-Attack      | a close-up view of a compass with a needle |                                                                                     | VT-Attack      | a man standing in front of a vintage jukebox    |
|  | No Attack      | a set of two padlocks with keys            |  | No Attack      | a white box with two green lights on top        |
|                                                                                     | E2E [7]        | a lock on a wooden table                   |                                                                                     | E2E [7]        | a pile of old electronics                       |
|                                                                                     | CLIP-Based [2] | a set of four metal bells                  |                                                                                     | CLIP-Based [2] | a plastic box with a clear plastic              |
|                                                                                     | VT-Attack      | a vintage jukebox with many records        |                                                                                     | VT-Attack      | 2003 Toyota Matrix in 3D red                    |
|  | No Attack      | a bird with a long, curved beak            |  | No Attack      | a man holding a bicycle on his head             |
|                                                                                     | E2E [7]        | two birds standing on a dirt road          |                                                                                     | E2E [7]        | a young boy holding a bicycle at sunset         |
|                                                                                     | CLIP-Based [2] | a group of birds sitting on the ground     |                                                                                     | CLIP-Based [2] | a person carrying a bicycle on their back       |
|                                                                                     | VT-Attack      | a vintage music box with a colorful design |                                                                                     | VT-Attack      | a person riding a bicycle on a path             |
|  | No Attack      | a hot pot of food on a stove               |  | No Attack      | a brown bear standing on a rocky cliff          |
|                                                                                     | E2E [7]        | a large pot filled with food               |                                                                                     | E2E [7]        | a brown bear carrying a stuffed animal          |
|                                                                                     | CLIP-Based [2] | a bowl of mixed seafood                    |                                                                                     | CLIP-Based [2] | a close-up view of a large clamshell on a beach |
|                                                                                     | VT-Attack      | a plate of crawfish etouffee               |                                                                                     | VT-Attack      | a dog with a carrot in its mouth                |

Table 5: Additional cases of attack results against mPLUG-Owl-2 [10] in different methods.

| Image                                                                             | Method    | LVLM-Output                                | Image                                                                             | Method    | LVLM-Output                              |
|-----------------------------------------------------------------------------------|-----------|--------------------------------------------|-----------------------------------------------------------------------------------|-----------|------------------------------------------|
|  | No Attack | a man with dreadlocks plays a trumpet      |  | No Attack | a bird sitting on a branch in the sky    |
|                                                                                   | E2E [7]   | a girl is playing a trumpet                |                                                                                   | E2E [7]   | a man holding a baby bird in his hand    |
|                                                                                   | VT-Attack | a doll is shown in two different pictures  |                                                                                   | VT-Attack | a group of people standing together      |
|  | No Attack | a bridge over a river with trees           |  | No Attack | a brown dog panting on a sidewalk        |
|                                                                                   | E2E [7]   | aerial view of san francisco bridge        |                                                                                   | E2E [7]   | an ostrich wearing a hat                 |
|                                                                                   | VT-Attack | a close up of a pair of pants              |                                                                                   | VT-Attack | a picture of a bridge with a blue sky    |
|  | No Attack | a white and gray dog standing on grass     |  | No Attack | a sewer cover with a metal design on it  |
|                                                                                   | E2E [7]   | a baby is sitting on top of a lion         |                                                                                   | E2E [7]   | a castle is shown on a tire              |
|                                                                                   | VT-Attack | a group of people are standing in a room   |                                                                                   | VT-Attack | two microphones are set up in a studio   |
|  | No Attack | a large building with a curved roof        |  | No Attack | a bridge over a river with a train on it |
|                                                                                   | E2E [7]   | a cruise ship in the ocean                 |                                                                                   | E2E [7]   | a man driving a car under a bridge       |
|                                                                                   | VT-Attack | a pair of shoes with the number 43 on them |                                                                                   | VT-Attack | a group of 777 nail polish bottles       |
|  | No Attack | a tank with people on top of it            |  | No Attack | a baby wearing a green knitted hat       |
|                                                                                   | E2E [7]   | a dog driving a tank with a missile        |                                                                                   | E2E [7]   | a man with a bubble on his face          |
|                                                                                   | VT-Attack | a photo of a person in a black dress       |                                                                                   | VT-Attack | a close-up of a gold and black watch     |

Table 6: Breakdown of LLaVA to non-visual prompts when queried with adversarial image in VT-Attack.

| Adversarial image                                                                   | Non-visual Prompt                       | LLaVA-Output                                 |
|-------------------------------------------------------------------------------------|-----------------------------------------|----------------------------------------------|
|  | What is artificial intelligence?        | in the a, a in the a, a in the a in the a in |
|                                                                                     | What is the capital of France?          | a person is holding a red glass ball         |
|                                                                                     | How do you bake a cake?                 | „„„, in the a„„„, in the a, a in the a in    |
|                                                                                     | Why do leaves change color in the fall? | the question, the question, the question     |

|                                                                                     |                  |                                           |                                                                                     |                  |                                           |
|-------------------------------------------------------------------------------------|------------------|-------------------------------------------|-------------------------------------------------------------------------------------|------------------|-------------------------------------------|
| Clean image                                                                         | LLaVA            | a man playing a trumpet on stage          | OpenAI CLIP adv                                                                     | LLaVA            | ... in the a,..., in the a                |
|    | Otter            | a man plays the French horn on stage      |    | Otter            | a photo of a room with a person           |
| →                                                                                   | LLaMA Adapter-v2 | a man is playing a trumpet                | →                                                                                   | LLaMA Adapter-v2 | two men are sitting on a couch            |
|                                                                                     | Open Flamingo    | a saxophonist plays a solo                |                                                                                     | Open Flamingo    | a man is holding a book                   |
| Clean image                                                                         | LLaVA            | a white ironing board with a blue cover   | OpenAI CLIP adv                                                                     | LLaVA            | a in a a in a a in a a in a a             |
|    | Otter            | an iron with a blue handle                |    | Otter            | a photo of a room with a window           |
| →                                                                                   | LLaMA Adapter-v2 | a white iron with a wooden handle         | →                                                                                   | LLaMA Adapter-v2 | a woman is watching TV                    |
|                                                                                     | Open Flamingo    | a white iron with a blue handle           |                                                                                     | Open Flamingo    | a man is sitting on a bench               |
| Clean image                                                                         | LLaVA            | a shopping cart with an American flag     | OpenAI CLIP adv                                                                     | LLaVA            | the, the, the, the, the, the, the, the    |
|    | Otter            | a shopping cart with a large flag         |    | Otter            | the person is standing behind a screen    |
| →                                                                                   | LLaMA Adapter-v2 | a shopping cart with an American flag     | →                                                                                   | LLaMA Adapter-v2 | a black image of a newspaper              |
|                                                                                     | Open Flamingo    | a shopping cart in a parking garage       |                                                                                     | Open Flamingo    | a man is standing in a doorway            |
| Clean image                                                                         | LLaVA            | a yellow school bus on a wet street       | OpenAI CLIP adv                                                                     | LLaVA            | a cat sitting on a truck's windshield     |
|   | Otter            | a school bus is parked in a lot           |   | Otter            | a cat hanging off of a vehicle            |
| →                                                                                   | LLaMA Adapter-v2 | a school bus driving down a wet road      | →                                                                                   | LLaMA Adapter-v2 | a blue truck with an advertisement        |
|                                                                                     | Open Flamingo    | a yellow school bus                       |                                                                                     | Open Flamingo    | a close up of a bottle of beer            |
| Clean image                                                                         | LLaVA            | a group of mushrooms in a forest          | OpenAI CLIP adv                                                                     | LLaVA            | a person holding a bunch of white balls   |
|  | Otter            | a bunch of mushrooms are growing          |  | Otter            | a man is standing near umbrellas          |
| →                                                                                   | LLaMA Adapter-v2 | a group of mushrooms growing together     | →                                                                                   | LLaMA Adapter-v2 | several jellyfish floating in the water   |
|                                                                                     | Open Flamingo    | a group of mushrooms in the forest        |                                                                                     | Open Flamingo    | a man in a black shirt and black pants    |
| Clean image                                                                         | LLaVA            | a large, open, and ornate shopping mall   | OpenAI CLIP adv                                                                     | LLaVA            | a person in a room with a large screen    |
|  | Otter            | an escalator in a mall with people on it  |  | Otter            | a blurry image of a building              |
| →                                                                                   | LLaMA Adapter-v2 | a large, open, and well-lit shopping mall | →                                                                                   | LLaMA Adapter-v2 | a group of people standing in pool        |
|                                                                                     | Open Flamingo    | the escalator at the Venetian Hotel       |                                                                                     | Open Flamingo    | an interior of Palais Garnier opera house |
| Clean image                                                                         | LLaVA            | a DJ turntable with a black color         | OpenAI CLIP adv                                                                     | LLaVA            | a glass bowl                              |
|  | Otter            | a close up view of a sound mixer          |  | Otter            | a dark room with a light shining on it    |
| →                                                                                   | LLaMA Adapter-v2 | a large DJ turntable with a Pioneer logo  | →                                                                                   | LLaMA Adapter-v2 | a man is holding a cell phone             |
|                                                                                     | Open Flamingo    | the Pioneer CDJ-2000 Nexus                |                                                                                     | Open Flamingo    | a close up of a woman's face              |

Figure 1: Additional comparison of the responses generated by various LVLMS when queried with clean images and adversarial images in VT-Attack against OpenAI CLIP [6].

|                                                                                     |                                            |                                                                                                                                                                                                                                               |              |                                            |           |                                          |              |                                          |   |                                                                                                                                                                                                                                 |        |                                          |           |                                         |              |                                        |
|-------------------------------------------------------------------------------------|--------------------------------------------|-----------------------------------------------------------------------------------------------------------------------------------------------------------------------------------------------------------------------------------------------|--------------|--------------------------------------------|-----------|------------------------------------------|--------------|------------------------------------------|---|---------------------------------------------------------------------------------------------------------------------------------------------------------------------------------------------------------------------------------|--------|------------------------------------------|-----------|-----------------------------------------|--------------|----------------------------------------|
| Clean image                                                                         |                                            |                                                                                                                                                                                                                                               | EVA CLIP adv |                                            |           |                                          |              |                                          |   |                                                                                                                                                                                                                                 |        |                                          |           |                                         |              |                                        |
|    | →                                          | <table><tr><td>BLIP-2</td><td>a red hoodie with a logo in the middle</td></tr><tr><td>MiniGPT-4</td><td>a red hoodie with a word "georgia" on it</td></tr><tr><td>InstructBLIP</td><td>a red hoodie with the word "Georgia"</td></tr></table> | BLIP-2       | a red hoodie with a logo in the middle     | MiniGPT-4 | a red hoodie with a word "georgia" on it | InstructBLIP | a red hoodie with the word "Georgia"     | → | <table><tr><td>BLIP-2</td><td>a photo of a room with a plant</td></tr><tr><td>MiniGPT-4</td><td>a person holding a cell phone</td></tr><tr><td>InstructBLIP</td><td>a vintage image of a gas pump</td></tr></table>             | BLIP-2 | a photo of a room with a plant           | MiniGPT-4 | a person holding a cell phone           | InstructBLIP | a vintage image of a gas pump          |
| BLIP-2                                                                              | a red hoodie with a logo in the middle     |                                                                                                                                                                                                                                               |              |                                            |           |                                          |              |                                          |   |                                                                                                                                                                                                                                 |        |                                          |           |                                         |              |                                        |
| MiniGPT-4                                                                           | a red hoodie with a word "georgia" on it   |                                                                                                                                                                                                                                               |              |                                            |           |                                          |              |                                          |   |                                                                                                                                                                                                                                 |        |                                          |           |                                         |              |                                        |
| InstructBLIP                                                                        | a red hoodie with the word "Georgia"       |                                                                                                                                                                                                                                               |              |                                            |           |                                          |              |                                          |   |                                                                                                                                                                                                                                 |        |                                          |           |                                         |              |                                        |
| BLIP-2                                                                              | a photo of a room with a plant             |                                                                                                                                                                                                                                               |              |                                            |           |                                          |              |                                          |   |                                                                                                                                                                                                                                 |        |                                          |           |                                         |              |                                        |
| MiniGPT-4                                                                           | a person holding a cell phone              |                                                                                                                                                                                                                                               |              |                                            |           |                                          |              |                                          |   |                                                                                                                                                                                                                                 |        |                                          |           |                                         |              |                                        |
| InstructBLIP                                                                        | a vintage image of a gas pump              |                                                                                                                                                                                                                                               |              |                                            |           |                                          |              |                                          |   |                                                                                                                                                                                                                                 |        |                                          |           |                                         |              |                                        |
| Clean image                                                                         |                                            |                                                                                                                                                                                                                                               | EVA CLIP adv |                                            |           |                                          |              |                                          |   |                                                                                                                                                                                                                                 |        |                                          |           |                                         |              |                                        |
|    | →                                          | <table><tr><td>BLIP-2</td><td>a blue and white pillow</td></tr><tr><td>MiniGPT-4</td><td>a green and brown leafy pattern</td></tr><tr><td>InstructBLIP</td><td>a blue and yellow pillow on a bed</td></tr></table>                            | BLIP-2       | a blue and white pillow                    | MiniGPT-4 | a green and brown leafy pattern          | InstructBLIP | a blue and yellow pillow on a bed        | → | <table><tr><td>BLIP-2</td><td>a map of Hawaii with a flower on it</td></tr><tr><td>MiniGPT-4</td><td>a close-up of a coffee cup</td></tr><tr><td>InstructBLIP</td><td>a black car is parked on a street</td></tr></table>       | BLIP-2 | a map of Hawaii with a flower on it      | MiniGPT-4 | a close-up of a coffee cup              | InstructBLIP | a black car is parked on a street      |
| BLIP-2                                                                              | a blue and white pillow                    |                                                                                                                                                                                                                                               |              |                                            |           |                                          |              |                                          |   |                                                                                                                                                                                                                                 |        |                                          |           |                                         |              |                                        |
| MiniGPT-4                                                                           | a green and brown leafy pattern            |                                                                                                                                                                                                                                               |              |                                            |           |                                          |              |                                          |   |                                                                                                                                                                                                                                 |        |                                          |           |                                         |              |                                        |
| InstructBLIP                                                                        | a blue and yellow pillow on a bed          |                                                                                                                                                                                                                                               |              |                                            |           |                                          |              |                                          |   |                                                                                                                                                                                                                                 |        |                                          |           |                                         |              |                                        |
| BLIP-2                                                                              | a map of Hawaii with a flower on it        |                                                                                                                                                                                                                                               |              |                                            |           |                                          |              |                                          |   |                                                                                                                                                                                                                                 |        |                                          |           |                                         |              |                                        |
| MiniGPT-4                                                                           | a close-up of a coffee cup                 |                                                                                                                                                                                                                                               |              |                                            |           |                                          |              |                                          |   |                                                                                                                                                                                                                                 |        |                                          |           |                                         |              |                                        |
| InstructBLIP                                                                        | a black car is parked on a street          |                                                                                                                                                                                                                                               |              |                                            |           |                                          |              |                                          |   |                                                                                                                                                                                                                                 |        |                                          |           |                                         |              |                                        |
| Clean image                                                                         |                                            |                                                                                                                                                                                                                                               | EVA CLIP adv |                                            |           |                                          |              |                                          |   |                                                                                                                                                                                                                                 |        |                                          |           |                                         |              |                                        |
|    | →                                          | <table><tr><td>BLIP-2</td><td>a stop sign and two street signs on a pole</td></tr><tr><td>MiniGPT-4</td><td>a street sign with a stop sign</td></tr><tr><td>InstructBLIP</td><td>a street sign with the name "McLean"</td></tr></table>       | BLIP-2       | a stop sign and two street signs on a pole | MiniGPT-4 | a street sign with a stop sign           | InstructBLIP | a street sign with the name "McLean"     | → | <table><tr><td>BLIP-2</td><td>a plant with a person sitting next to it</td></tr><tr><td>MiniGPT-4</td><td>a woman is holding a glass of wine</td></tr><tr><td>InstructBLIP</td><td>a man is playing a trumpet</td></tr></table> | BLIP-2 | a plant with a person sitting next to it | MiniGPT-4 | a woman is holding a glass of wine      | InstructBLIP | a man is playing a trumpet             |
| BLIP-2                                                                              | a stop sign and two street signs on a pole |                                                                                                                                                                                                                                               |              |                                            |           |                                          |              |                                          |   |                                                                                                                                                                                                                                 |        |                                          |           |                                         |              |                                        |
| MiniGPT-4                                                                           | a street sign with a stop sign             |                                                                                                                                                                                                                                               |              |                                            |           |                                          |              |                                          |   |                                                                                                                                                                                                                                 |        |                                          |           |                                         |              |                                        |
| InstructBLIP                                                                        | a street sign with the name "McLean"       |                                                                                                                                                                                                                                               |              |                                            |           |                                          |              |                                          |   |                                                                                                                                                                                                                                 |        |                                          |           |                                         |              |                                        |
| BLIP-2                                                                              | a plant with a person sitting next to it   |                                                                                                                                                                                                                                               |              |                                            |           |                                          |              |                                          |   |                                                                                                                                                                                                                                 |        |                                          |           |                                         |              |                                        |
| MiniGPT-4                                                                           | a woman is holding a glass of wine         |                                                                                                                                                                                                                                               |              |                                            |           |                                          |              |                                          |   |                                                                                                                                                                                                                                 |        |                                          |           |                                         |              |                                        |
| InstructBLIP                                                                        | a man is playing a trumpet                 |                                                                                                                                                                                                                                               |              |                                            |           |                                          |              |                                          |   |                                                                                                                                                                                                                                 |        |                                          |           |                                         |              |                                        |
| Clean image                                                                         |                                            |                                                                                                                                                                                                                                               | EVA CLIP adv |                                            |           |                                          |              |                                          |   |                                                                                                                                                                                                                                 |        |                                          |           |                                         |              |                                        |
|    | →                                          | <table><tr><td>BLIP-2</td><td>a pile of plastic pens</td></tr><tr><td>MiniGPT-4</td><td>a large pile of colorful pencils</td></tr><tr><td>InstructBLIP</td><td>a close-up view of a pile of pencils</td></tr></table>                         | BLIP-2       | a pile of plastic pens                     | MiniGPT-4 | a large pile of colorful pencils         | InstructBLIP | a close-up view of a pile of pencils     | → | <table><tr><td>BLIP-2</td><td>a close-up of a red machine tool</td></tr><tr><td>MiniGPT-4</td><td>a red and black object with a frame</td></tr><tr><td>InstructBLIP</td><td>a blue and purple bicycle</td></tr></table>         | BLIP-2 | a close-up of a red machine tool         | MiniGPT-4 | a red and black object with a frame     | InstructBLIP | a blue and purple bicycle              |
| BLIP-2                                                                              | a pile of plastic pens                     |                                                                                                                                                                                                                                               |              |                                            |           |                                          |              |                                          |   |                                                                                                                                                                                                                                 |        |                                          |           |                                         |              |                                        |
| MiniGPT-4                                                                           | a large pile of colorful pencils           |                                                                                                                                                                                                                                               |              |                                            |           |                                          |              |                                          |   |                                                                                                                                                                                                                                 |        |                                          |           |                                         |              |                                        |
| InstructBLIP                                                                        | a close-up view of a pile of pencils       |                                                                                                                                                                                                                                               |              |                                            |           |                                          |              |                                          |   |                                                                                                                                                                                                                                 |        |                                          |           |                                         |              |                                        |
| BLIP-2                                                                              | a close-up of a red machine tool           |                                                                                                                                                                                                                                               |              |                                            |           |                                          |              |                                          |   |                                                                                                                                                                                                                                 |        |                                          |           |                                         |              |                                        |
| MiniGPT-4                                                                           | a red and black object with a frame        |                                                                                                                                                                                                                                               |              |                                            |           |                                          |              |                                          |   |                                                                                                                                                                                                                                 |        |                                          |           |                                         |              |                                        |
| InstructBLIP                                                                        | a blue and purple bicycle                  |                                                                                                                                                                                                                                               |              |                                            |           |                                          |              |                                          |   |                                                                                                                                                                                                                                 |        |                                          |           |                                         |              |                                        |
| Clean image                                                                         |                                            |                                                                                                                                                                                                                                               | EVA CLIP adv |                                            |           |                                          |              |                                          |   |                                                                                                                                                                                                                                 |        |                                          |           |                                         |              |                                        |
|  | →                                          | <table><tr><td>BLIP-2</td><td>the courthouse in the town</td></tr><tr><td>MiniGPT-4</td><td>a tall brick building with a clock tower</td></tr><tr><td>InstructBLIP</td><td>a large, old building with a clock tower</td></tr></table>         | BLIP-2       | the courthouse in the town                 | MiniGPT-4 | a tall brick building with a clock tower | InstructBLIP | a large, old building with a clock tower | → | <table><tr><td>BLIP-2</td><td>a man in a suit and tie</td></tr><tr><td>MiniGPT-4</td><td>a glass bottle in the image</td></tr><tr><td>InstructBLIP</td><td>a man is walking down a street</td></tr></table>                     | BLIP-2 | a man in a suit and tie                  | MiniGPT-4 | a glass bottle in the image             | InstructBLIP | a man is walking down a street         |
| BLIP-2                                                                              | the courthouse in the town                 |                                                                                                                                                                                                                                               |              |                                            |           |                                          |              |                                          |   |                                                                                                                                                                                                                                 |        |                                          |           |                                         |              |                                        |
| MiniGPT-4                                                                           | a tall brick building with a clock tower   |                                                                                                                                                                                                                                               |              |                                            |           |                                          |              |                                          |   |                                                                                                                                                                                                                                 |        |                                          |           |                                         |              |                                        |
| InstructBLIP                                                                        | a large, old building with a clock tower   |                                                                                                                                                                                                                                               |              |                                            |           |                                          |              |                                          |   |                                                                                                                                                                                                                                 |        |                                          |           |                                         |              |                                        |
| BLIP-2                                                                              | a man in a suit and tie                    |                                                                                                                                                                                                                                               |              |                                            |           |                                          |              |                                          |   |                                                                                                                                                                                                                                 |        |                                          |           |                                         |              |                                        |
| MiniGPT-4                                                                           | a glass bottle in the image                |                                                                                                                                                                                                                                               |              |                                            |           |                                          |              |                                          |   |                                                                                                                                                                                                                                 |        |                                          |           |                                         |              |                                        |
| InstructBLIP                                                                        | a man is walking down a street             |                                                                                                                                                                                                                                               |              |                                            |           |                                          |              |                                          |   |                                                                                                                                                                                                                                 |        |                                          |           |                                         |              |                                        |
| Clean image                                                                         |                                            |                                                                                                                                                                                                                                               | EVA CLIP adv |                                            |           |                                          |              |                                          |   |                                                                                                                                                                                                                                 |        |                                          |           |                                         |              |                                        |
|  | →                                          | <table><tr><td>BLIP-2</td><td>the king penguin is standing by himself</td></tr><tr><td>MiniGPT-4</td><td>a penguin standing on a beach</td></tr><tr><td>InstructBLIP</td><td>a penguin standing on a sandy beach</td></tr></table>            | BLIP-2       | the king penguin is standing by himself    | MiniGPT-4 | a penguin standing on a beach            | InstructBLIP | a penguin standing on a sandy beach      | → | <table><tr><td>BLIP-2</td><td>a blue swimming pool</td></tr><tr><td>MiniGPT-4</td><td>a close up of a sign</td></tr><tr><td>InstructBLIP</td><td>a man is playing a trumpet</td></tr></table>                                   | BLIP-2 | a blue swimming pool                     | MiniGPT-4 | a close up of a sign                    | InstructBLIP | a man is playing a trumpet             |
| BLIP-2                                                                              | the king penguin is standing by himself    |                                                                                                                                                                                                                                               |              |                                            |           |                                          |              |                                          |   |                                                                                                                                                                                                                                 |        |                                          |           |                                         |              |                                        |
| MiniGPT-4                                                                           | a penguin standing on a beach              |                                                                                                                                                                                                                                               |              |                                            |           |                                          |              |                                          |   |                                                                                                                                                                                                                                 |        |                                          |           |                                         |              |                                        |
| InstructBLIP                                                                        | a penguin standing on a sandy beach        |                                                                                                                                                                                                                                               |              |                                            |           |                                          |              |                                          |   |                                                                                                                                                                                                                                 |        |                                          |           |                                         |              |                                        |
| BLIP-2                                                                              | a blue swimming pool                       |                                                                                                                                                                                                                                               |              |                                            |           |                                          |              |                                          |   |                                                                                                                                                                                                                                 |        |                                          |           |                                         |              |                                        |
| MiniGPT-4                                                                           | a close up of a sign                       |                                                                                                                                                                                                                                               |              |                                            |           |                                          |              |                                          |   |                                                                                                                                                                                                                                 |        |                                          |           |                                         |              |                                        |
| InstructBLIP                                                                        | a man is playing a trumpet                 |                                                                                                                                                                                                                                               |              |                                            |           |                                          |              |                                          |   |                                                                                                                                                                                                                                 |        |                                          |           |                                         |              |                                        |
| Clean image                                                                         |                                            |                                                                                                                                                                                                                                               | EVA CLIP adv |                                            |           |                                          |              |                                          |   |                                                                                                                                                                                                                                 |        |                                          |           |                                         |              |                                        |
|  | →                                          | <table><tr><td>BLIP-2</td><td>a dining table and chairs</td></tr><tr><td>MiniGPT-4</td><td>a large wooden dining table with chairs</td></tr><tr><td>InstructBLIP</td><td>a dining table with a set of chairs</td></tr></table>                | BLIP-2       | a dining table and chairs                  | MiniGPT-4 | a large wooden dining table with chairs  | InstructBLIP | a dining table with a set of chairs      | → | <table><tr><td>BLIP-2</td><td>a black and white photo of a room</td></tr><tr><td>MiniGPT-4</td><td>a dog and a cat are playing with a bird</td></tr><tr><td>InstructBLIP</td><td>a man is watching TV</td></tr></table>         | BLIP-2 | a black and white photo of a room        | MiniGPT-4 | a dog and a cat are playing with a bird | InstructBLIP | a man is watching TV                   |
| BLIP-2                                                                              | a dining table and chairs                  |                                                                                                                                                                                                                                               |              |                                            |           |                                          |              |                                          |   |                                                                                                                                                                                                                                 |        |                                          |           |                                         |              |                                        |
| MiniGPT-4                                                                           | a large wooden dining table with chairs    |                                                                                                                                                                                                                                               |              |                                            |           |                                          |              |                                          |   |                                                                                                                                                                                                                                 |        |                                          |           |                                         |              |                                        |
| InstructBLIP                                                                        | a dining table with a set of chairs        |                                                                                                                                                                                                                                               |              |                                            |           |                                          |              |                                          |   |                                                                                                                                                                                                                                 |        |                                          |           |                                         |              |                                        |
| BLIP-2                                                                              | a black and white photo of a room          |                                                                                                                                                                                                                                               |              |                                            |           |                                          |              |                                          |   |                                                                                                                                                                                                                                 |        |                                          |           |                                         |              |                                        |
| MiniGPT-4                                                                           | a dog and a cat are playing with a bird    |                                                                                                                                                                                                                                               |              |                                            |           |                                          |              |                                          |   |                                                                                                                                                                                                                                 |        |                                          |           |                                         |              |                                        |
| InstructBLIP                                                                        | a man is watching TV                       |                                                                                                                                                                                                                                               |              |                                            |           |                                          |              |                                          |   |                                                                                                                                                                                                                                 |        |                                          |           |                                         |              |                                        |
| Clean image                                                                         |                                            |                                                                                                                                                                                                                                               | EVA CLIP adv |                                            |           |                                          |              |                                          |   |                                                                                                                                                                                                                                 |        |                                          |           |                                         |              |                                        |
|  | →                                          | <table><tr><td>BLIP-2</td><td>a baseball player in uniform with a glove</td></tr><tr><td>MiniGPT-4</td><td>a baseball player in a uniform</td></tr><tr><td>InstructBLIP</td><td>a baseball player, likely a catcher</td></tr></table>         | BLIP-2       | a baseball player in uniform with a glove  | MiniGPT-4 | a baseball player in a uniform           | InstructBLIP | a baseball player, likely a catcher      | → | <table><tr><td>BLIP-2</td><td>the people are facing the camera</td></tr><tr><td>MiniGPT-4</td><td>a close-up of a man's face</td></tr><tr><td>InstructBLIP</td><td>a man and a woman are sitting together</td></tr></table>     | BLIP-2 | the people are facing the camera         | MiniGPT-4 | a close-up of a man's face              | InstructBLIP | a man and a woman are sitting together |
| BLIP-2                                                                              | a baseball player in uniform with a glove  |                                                                                                                                                                                                                                               |              |                                            |           |                                          |              |                                          |   |                                                                                                                                                                                                                                 |        |                                          |           |                                         |              |                                        |
| MiniGPT-4                                                                           | a baseball player in a uniform             |                                                                                                                                                                                                                                               |              |                                            |           |                                          |              |                                          |   |                                                                                                                                                                                                                                 |        |                                          |           |                                         |              |                                        |
| InstructBLIP                                                                        | a baseball player, likely a catcher        |                                                                                                                                                                                                                                               |              |                                            |           |                                          |              |                                          |   |                                                                                                                                                                                                                                 |        |                                          |           |                                         |              |                                        |
| BLIP-2                                                                              | the people are facing the camera           |                                                                                                                                                                                                                                               |              |                                            |           |                                          |              |                                          |   |                                                                                                                                                                                                                                 |        |                                          |           |                                         |              |                                        |
| MiniGPT-4                                                                           | a close-up of a man's face                 |                                                                                                                                                                                                                                               |              |                                            |           |                                          |              |                                          |   |                                                                                                                                                                                                                                 |        |                                          |           |                                         |              |                                        |
| InstructBLIP                                                                        | a man and a woman are sitting together     |                                                                                                                                                                                                                                               |              |                                            |           |                                          |              |                                          |   |                                                                                                                                                                                                                                 |        |                                          |           |                                         |              |                                        |

Figure 2: Additional comparison of the responses generated by various LVLMs when queried with clean images and adversarial images in VT-Attack against EVA CLIP [3].

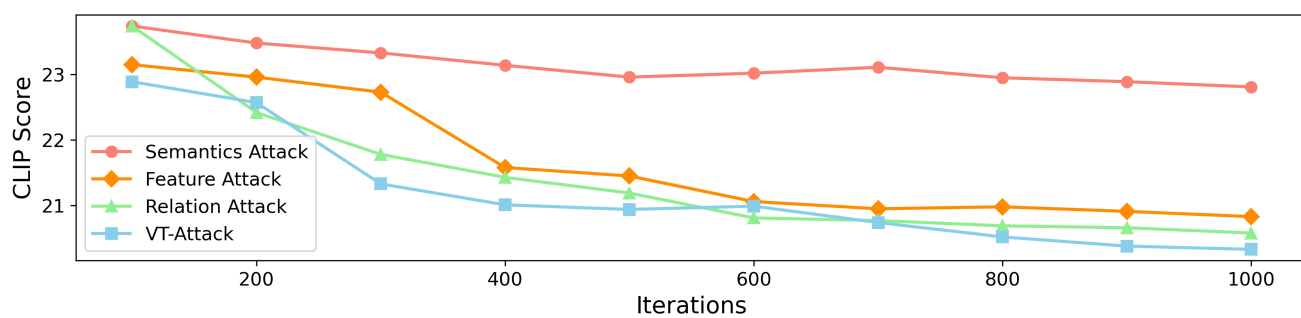

Figure 3: The relationship between attack performance and iterations (taking LLaVA [5] as an example).

## REFERENCES

- [1] Wei-Lin Chiang, Zhuohan Li, Zi Lin, Ying Sheng, Zhanghao Wu, Hao Zhang, Lianmin Zheng, Siyuan Zhuang, Yonghao Zhuang, Joseph E. Gonzalez, Ion Stoica, and Eric P. Xing. 2023. Vicuna: An Open-Source Chatbot Impressing GPT-4 with 90%\* ChatGPT Quality. <https://lmsys.org/blog/2023-03-30-vicuna/>
- [2] Xuanimng Cui, Alejandro Aparcedo, Young Kyun Jang, and Ser-Nam Lim. 2023. On the Robustness of Large Multimodal Models Against Image Adversarial Attacks. *arXiv preprint arXiv:2312.03777* (2023).
- [3] Yuxin Fang, Wen Wang, Binhui Xie, Quan Sun, Ledell Wu, Xinggang Wang, Tiejun Huang, Xinlong Wang, and Yue Cao. 2023. EVA: Exploring the Limits of Masked Visual Representation Learning at Scale. In *IEEE/CVF Conference on Computer Vision and Pattern Recognition, CVPR 2023, Vancouver, BC, Canada, June 17-24, 2023*. IEEE, 19358–19369. <https://doi.org/10.1109/CVPR52729.2023.01855>
- [4] Junnan Li, Dongxu Li, Silvio Savarese, and Steven C. H. Hoi. 2023. BLIP-2: Bootstrapping Language-Image Pre-training with Frozen Image Encoders and Large Language Models. In *International Conference on Machine Learning, ICML 2023, 23-29 July 2023, Honolulu, Hawaii, USA (Proceedings of Machine Learning Research, Vol. 202)*, Andreas Krause, Emma Brunskill, Kyunghyun Cho, Barbara Engelhardt, Sivan Sabato, and Jonathan Scarlett (Eds.). PMLR, 19730–19742. <https://proceedings.mlr.press/v202/li23q.html>
- [5] Haotian Liu, Chunyuan Li, Qingyang Wu, and Yong Jae Lee. 2023. Visual Instruction Tuning. *CoRR* abs/2304.08485 (2023). <https://doi.org/10.48550/arXiv.2304.08485>
- [6] Alec Radford, Jong Wook Kim, Chris Hallacy, Aditya Ramesh, Gabriel Goh, Sandhini Agarwal, Girish Sastry, Amanda Askell, Pamela Mishkin, Jack Clark, Gretchen Krueger, and Ilya Sutskever. 2021. Learning Transferable Visual Models From Natural Language Supervision. In *Proceedings of the 38th International Conference on Machine Learning, ICML 2021, 18-24 July 2021, Virtual Event (Proceedings of Machine Learning Research, Vol. 139)*, Marina Meila and Tong Zhang (Eds.). PMLR, 8748–8763. <http://proceedings.mlr.press/v139/radford21a.html>
- [7] Christian Schlarman and Matthias Hein. 2023. On the Adversarial Robustness of Multi-Modal Foundation Models. In *IEEE/CVF International Conference on Computer Vision, ICCV 2023 - Workshops, Paris, France, October 2-6, 2023*. IEEE, 3679–3687. <https://doi.org/10.1109/ICCVW60793.2023.00395>
- [8] MosaicML NLP Team. 2023. *Introducing MPT-7B: A New Standard for Open-Source, Commercially Usable LLMs*. [www.mosaicml.com/blog/mpt-7b](http://www.mosaicml.com/blog/mpt-7b) Accessed: 2023-05-05.
- [9] Hugo Touvron, Thibaut Lavril, Gautier Izacard, Xavier Martinet, Marie-Anne Lachaux, Timothée Lacroix, Baptiste Rozière, Naman Goyal, Eric Hambro, Faisal Azhar, Aurelien Rodriguez, Armand Joulin, Edouard Grave, and Guillaume Lample. 2023. LLaMA: Open and Efficient Foundation Language Models. *arXiv:2302.13971* [cs.CL]
- [10] Qinghao Ye, Haiyang Xu, Jiabo Ye, Ming Yan, Haowei Liu, Qi Qian, Ji Zhang, Fei Huang, and Jingren Zhou. 2023. mplug-owl2: Revolutionizing multi-modal large language model with modality collaboration. *arXiv preprint arXiv:2311.04257* (2023).
- [11] Susan Zhang, Stephen Roller, Naman Goyal, Mikel Artetxe, Moya Chen, Shuohui Chen, Christopher Dewan, Mona Diab, Xian Li, Xi Victoria Lin, Todor Mihaylov, Myle Ott, Sam Shleifer, Kurt Shuster, Daniel Simig, Punit Singh Koura, Anjali Sridhar, Tianlu Wang, and Luke Zettlemoyer. 2022. OPT: Open Pre-trained Transformer Language Models. *arXiv:2205.01068* [cs.CL]
- [12] Deyao Zhu, Jun Chen, Xiaoqian Shen, Xiang Li, and Mohamed Elhoseiny. 2023. MiniGPT-4: Enhancing Vision-Language Understanding with Advanced Large Language Models. *CoRR* abs/2304.10592 (2023). <https://doi.org/10.48550/arXiv.2304.10592>
